# Supplementary material for: Molecular Phylogeny and Adaptive Mitochondrial DNA Evolution of Salmonids (Pisces: Salmonidae)
Source: Front Genet. 2022 Jun 17;13:903240. doi: 10.3389/fgene.2022.903240 (PMC9249015; doi:10.3389/fgene.2022.903240)
Supplement: Supplementary file 1 [file Table2.XLS]

## Sheet: kaks.each.gene
Supplementary TableS2: The dN/dS ratios for concatenated 13 mitochondrial protein-coding genes and individual genes in 49 salmonid mitochodrial genomes and two outgroup species.
Accession_number	Migration	Species	dN/dS	ATP6	ATP8	COX1	COX2	COX3	CYTB	ND1	ND2	ND3	ND4	ND4L	ND5	ND6
NC_000860	Anadromus	Salvelinus fontinalis	0.0001	2.0893	6.2526	0.0001	0.0001	0.0001	0.0001	0.0001	9.7706	2.285	0.0001	2.4057	2.1437	0.0001
NC_000861	Anadromus	Salvelinus alpinus	0.0595	0.0001	8.2971	0.0001	0.0001	0.0001	0.0001	0.2024	0.2184	0.4199	0.1153	3.2037	0.0001	0.1302
NC_001717	Anadromus	Oncorhynchus mykiss	0.0564	0.0001	0.0001	0.0105	0.033	0.0243	0.0106	0.054	0.0997	0.0266	0.0315	0.0001	0.1784	0.0001
NC_001960	Anadromus	Salmo salar	0.033	0.0267	0.0001	0.0121	0.0447	0.0271	0.0087	0.0168	0.0892	0.0458	0.048	0.1197	0.0135	0.0588
NC_002646	Anadromus	Coregonus lavaretus	0.0001	0.0001	4.2756	0.0001	1.9262	0.0001	2.8134	0.0001	0.0001	2.683	0.0001	0.0001	0.0001	12.0066
NC_002980	Anadromus	Oncorhynchus tshawytscha	0.0601	0.0211	2.4325	0.0001	0.0634	0.0001	0.0255	0.0001	0.0942	0.149	0.035	0.0001	0.1848	0.0728
NC_004593	Freshwater	Esox lucius	0.045	0.028	0.3104	0.0053	0.0321	0.0092	0.0165	0.0266	0.0984	0.1178	0.0499	0.0377	0.0311	0.0096
NC_006897	Anadromus	Oncorhynchus clarkii henshawi	0.022	0.0001	0.0001	0.0001	0.02	0.0001	0.0151	0.0323	0.0299	0.0001	0.0493	0.0001	0.0232	0.0149
NC_008615	Anadromus	Oncorhynchus nerka	0.0242	0.0418	0.0001	0.0001	0.0473	0.0001	0.0001	0.019	0.0271	0.0928	0.022	0.0001	0.0495	0.0182
NC_008745	Anadromus	Oncorhynchus masou formosanus	0.2522	0.0001	612.912	0.0001	0.0001	999	0.0001	0.8915	0.4115	0.0001	0.4487	5.1241	0.2637	0.0001
NC_008746	Anadromus	Oncorhynchus masou ishikawae	0.1153	1.7899	999	0.0001	0.0001	0.0001	0.0001	0.0001	0.4141	1.3666	0.4481	2.9803	0.1981	0.0001
NC_008747	Anadromus	Oncorhynchus masou masou	0.0282	0.0001	9.5249	0.0001	0.0001	0.0001	0.0001	0.0001	0.4151	1.9405	0.0001	4.0647	0.0001	0.0001
NC_009262	Anadromus	Oncorhynchus masou 'Biwa'	0.1396	0.2511	11.1768	0.0677	0.0001	0.0001	0.2567	0.0001	2.721	1.788	0.079	0.0001	0.4237	904.489
NC_009263	Anadromus	Oncorhynchus kisutch	0.029	0.0001	0.0001	0.0001	0.0001	0.0001	0.0109	0.0874	0.0001	0.0507	0.0826	0.0001	0.0464	0.0001
NC_010007	Anadromus	Salmo trutta trutta	0.0001	2.2523	9.6507	0.0001	0.0001	0.0001	1.5202	0.0001	0.0001	0.4536	0.0001	1.6549	0.0001	0.0001
NC_010959	Anadromus	Oncorhynchus gorbuscha	0.0172	0.0001	0.0001	0.0365	0.0001	0.0001	0.0271	0.0001	0.0093	0.0001	0.0163	0.0001	0.0217	0.0824
NC_012928	Freshwater	Thymallus thymallus	0.0344	0.0239	11.6338	0.034	0.0001	0.0539	0.023	0.0189	0.0483	0.0527	0.021	0.0001	0.068	0.0235
NC_012929	Freshwater	Thymallus arcticus	0.0785	0.0001	14.0092	0.0737	0.0001	0.3315	0.0001	0.0001	0.0462	0.5707	0.1598	0.0001	0.1417	0.0001
NC_015246	Freshwater	Osmerus mordax	0.0245	0.0003	0.1804	0.0031	0.0118	0.0142	0.0342	0.0048	0.0596	0.0263	0.0083	0.0262	0.0158	0.0018
NC_015995	Freshwater	Hucho bleekeri	0.0921	0.1926	0.0931	0.0001	0.0001	0.0001	0.0504	0.0858	0.0434	0.0001	0.0715	0.1288	0.2242	0.2054
NC_016426	Freshwater	Hucho taimen	0.0577	5.4021	10.1726	0.0001	0.0779	0.0001	999	0.1409	0.1107	3.1017	0.0001	0.0001	0.1141	3.5775
NC_017838	Anadromus	Oncorhynchus keta	0.0174	0.0001	0.0001	0.0001	0.0001	0.0229	0.0001	0.0116	0.0388	0.0163	0.0098	0.0001	0.0339	0.1203
NC_018341	Freshwater	Brachymystax lenok	0.0252	0.0608	8.1834	0.0001	0.0001	0.0001	0.0541	0.0001	0.0001	2.6412	0.0444	0.0001	0.0728	0.0001
NC_018342	Freshwater	Brachymystax lenok tsinlingensis	0.0389	0.0475	0.0001	0.0001	0.0001	0.0856	0.0372	0.0954	0.0243	0.0001	0.0414	0.0001	0.0402	2.9742
NC_020760	Anadromus	Coregonus nasus	1.8971	1.8964	0.0001	406.806	0.0001	6.0973	2.9812	41.4149	30.1478	1.9146	120.006	3.2944	1.9675	15.8634
NC_020761	Anadromus	Stenodus leucichthys	0.0342	0.0001	0.0001	0.0148	0.0231	0.0001	0.0001	0.0442	0.0482	0.0985	0.007	139.544	0.1183	0.0001
NC_020762	Anadromus	Coregonus clupeaformis	0.2189	1.9175	0.0001	0.0001	999	0.0001	1.6644	0.0001	148.204	0.0001	0.0001	0.6403	0.4046	14.7622
NC_020763	Freshwater	Prosopium williamsoni	0.0251	0.0001	0.0001	0.0001	0.0001	0.0112	0.0191	0.0077	0.0504	0.0001	0.0594	0.0001	0.0307	0.0001
NC_020764	Freshwater	Prosopium cylindraceum	0.0222	1.315	10.1461	0.0001	0.0001	0.0001	0.0318	0.0193	0.038	0.0679	0.0171	0.0001	0.0268	0.0536
NC_020765	Anadromus	Coregonus oxyrinchus	0.0938	1.6899	0.0001	12.4093	0.0001	0.0001	0.0001	17.3792	0.4621	1.4527	122.143	0.0001	0.0001	16.1467
NC_021651	Anadromus	Parahucho perryi	0.0331	0.0205	0.1791	0.0001	0.0001	0.0092	0.0001	0.0001	0.0377	0.0001	0.0627	0.0393	0.0646	0.0782
NC_022844	Anadromus	Salvelinus leucomaenis	0.1017	0.0001	598.298	0.0001	1.1888	0.0001	0.015	0.0536	185.094	2.0414	999	0.2222	2.0484	0.0001
NC_022925	Freshwater	Thymallus grubii	0.0205	0.0001	0.0001	0.0001	0.2026	0.0001	0.0001	0.027	0.0448	0.0001	0.0001	0.0001	0.0934	0.0001
NC_024032	Anadromus	Salmo trutta	0.2499	0.0001	9.4209	0.0001	0.0001	0.0001	1.7043	0.0001	0.0001	3.3129	0.0001	2.8365	1.1527	0.0001
NC_024585	Anadromus	Salvelinus curilus	0.0281	0.0001	0.0001	0.0001	0.0001	0.0622	0.0001	0.0001	0.038	0.2165	0.0707	0.0001	0.037	0.0001
NC_024674	Freshwater	Brachymystax tumensis	0.0081	0.0001	0.0001	0.0001	0.0001	0.0001	0.0001	0.0001	0.0389	0.0001	0.0001	0.0001	0.0186	0.0167
NC_025576	Anadromus	Coregonus peled	0.0001	2.0333	6.6569	12.7458	0.0001	0.0001	2.6949	0.0001	24.3958	1.922	96.3354	1.3446	2.0926	0.0001
NC_025589	Freshwater	Hucho hucho	0.0529	0.0001	12.6011	0.0001	0.0001	0.0001	0.0701	0.0859	0.1904	0.0001	0.0001	0.0001	0.1206	0.0834
NC_025648	Anadromus	Coregonus ussuriensis	0.0444	1.7653	2.8008	13.611	0.0001	0.0001	2.5846	17.9814	24.9288	0.0001	0.0001	2.0317	0.0001	0.2883
NC_027277	Anadromus	Coregonus autumnalis	0.0001	1.9436	0.0001	0.0001	0.6273	0.0001	1.6945	32.4945	33.0697	2.0941	118.432	1.7081	0.0001	14.5734
NC_027408	Freshwater	Thymallus pallasii	0.0285	0.0001	0.0001	0.0001	0.0332	0.0001	0.0212	0.0732	0.027	0.3167	0.0175	0.0001	0.0519	0.0001
NC_027409	Freshwater	Thymallus tugarinae	0.0211	1.8381	274.994	0.0001	0.0001	0.0001	0.0001	0.0001	0.0001	2.8196	0.0001	1.5957	0.0001	785.739
NC_027410	Freshwater	Thymallus yaluensis	0.0112	0.0116	14.2729	0.0001	0.0772	0.0001	0.0041	0.0001	0.0001	0.4428	0.0001	0.0001	0.0001	0.0001
NC_027411	Freshwater	Thymallus burejensis	0.0433	1.719	11.6159	0.0001	0.0001	0.0001	0.1153	0.0001	0.0001	2.7625	0.0001	2.6174	0.049	0.0208
NC_027412	Freshwater	Thymallus brevirostris	0.0315	0.0001	0.0001	0.0001	0.0001	0.0001	0.0989	0.016	0.1331	0.0948	0.0105	0.0428	0.0152	0.0215
NC_028018	Anadromus	Salvelinus albus	0.1434	0.0001	14.4397	0.9016	0.0001	999	0.0001	0.0001	13.6062	1.7398	999	0.0001	1.866	0.0001
NC_028198	Anadromus	Coregonus cluncaformis	0.0514	0.0001	0.0001	117.932	0.0001	0.0001	1.1222	0.0001	16.5982	1.8951	0.0001	1.8029	0.4145	16.3219
NC_028593	Anadromus	Coregonus muksun	0.0602	0.0001	6.9856	0.0001	0.0001	0.0001	0.0001	19.8793	183.979	2.2879	0.0001	3.0577	2.002	15.3967
NC_029216	Freshwater	Thymallus mertensii	0.0371	1.4428	17.9807	0.0001	0.0001	0.0001	0.0001	0.1062	0.0001	0.0001	0.058	0.0001	0.0001	0.0001
NC_029877	Freshwater	Salvelinus kuznetzovi	0.0001	2.3312	150.972	0.0001	0.0001	0.0001	0.0001	6.8952	14.1809	0.0001	0.0001	3.2232	2.31	0.0001
NC_030175	Anadromus	Coregonus chadary	2.2828	2.2845	2.0899	10.4449	0.0001	5.5966	3.0765	26.681	25.0551	2.5483	93.8931	5.4965	2.3364	12.968
