# Supplementary material for: Molecular Phylogeny and Adaptive Mitochondrial DNA Evolution of Salmonids (Pisces: Salmonidae)
Source: Front Genet. 2022 Jun 17;13:903240. doi: 10.3389/fgene.2022.903240 (PMC9249015; doi:10.3389/fgene.2022.903240)
Supplement: Supplementary file 3 [file Table1.XLSX]

## Sheet: Supplementary TableS1
Supplementary TableS1: Characteristics of salmonids and Genbank accession numbers for mitogenomes
Species	Mitogenome accesssion number	Environment	Vernacular name
Brachymystax lenok	NC_018341	Freshwater	Lenok
Brachymystax lenok tsinlingensis	NC_018342	Freshwater	Lenok
Brachymystax tumensis	NC_024674	Freshwater	Blunt-snouted lenok
Coregonus autumnalis	NC_027277	Marine/Freshwater	Arctic cisco
Coregonus chadary	NC_030175	Freshwater	Khadary-whitefish
Coregonus clupeaformis	NC_020762	Marine/Freshwater	Lake whitefish
Coregonus lavaretus	NC_002646	Marine/Freshwater	European whitefish
Coregonus muksun	NC_028593	Marine/Freshwater	Muksun
Coregonus nasus	NC_020760	Marine/Freshwater	Broad whitefish
Coregonus oxyrinchus	NC_020765	Marine/Freshwater	Houting
Coregonus peled	NC_025576	Marine/Freshwater	Peled
Coregonus cluncaformis	NC_028198	Marine/Freshwater	Lake whitefish
Coregonus ussuriensis	NC_025648	Marine/Freshwater	Amur whitefish
Hucho bleekeri	NC_015995	Freshwater	Sichuan taimen
Hucho hucho	NC_025589	Freshwater	Taimen
Hucho taimen	NC_016426	Freshwater	Huchen
Oncorhynchus clarkii henshawi	NC_006897	Marine/Freshwater	Cutthroat trout
Oncorhynchus gorbuscha	NC_010959	Marine/Freshwater	Pink salmon
Oncorhynchus keta	NC_017838	Marine/Freshwater	Chum salmon
Oncorhynchus kisutch	NC_009263	Marine/Freshwater	Coho salmon
Oncorhynchus masou 'Biwa'	NC_009262	Marine/Freshwater	Biwa salmon
Oncorhynchus masou formosanus	NC_008745	Marine/Freshwater	Formosan landlocked salmon
Oncorhynchus masou ishikawae	NC_008746	Marine/Freshwater	Red-spotted masu salmon
Oncorhynchus masou masou	NC_008747	Marine/Freshwater	Masu salmon
Oncorhynchus mykiss	NC_001717	Marine/Freshwater	Rainbow trout
Oncorhynchus nerka	NC_008615	Marine/Freshwater	Sockeye salmon
Oncorhynchus tshawytscha	NC_002980	Marine/Freshwater	Chinook salmon
Parahucho perryi	NC_021651	Marine/Freshwater	Japanese huchen
Prosopium cylindraceum	NC_020764	Freshwater	Round whitefish
Prosopium williamsoni	NC_020763	Freshwater	Mountain whitefish
Salmo salar	NC_001960	Marine/Freshwater	Atlantic salmon
Salmo trutta	NC_024032	Marine/Freshwater	Sea trout
Salmo trutta trutta	NC_010007	Marine/Freshwater	Sea trout
Salvelinus albus	NC_028018	Marine/Freshwater	White char
Salvelinus alpinus	NC_000861	Marine/Freshwater	Arctic char
Salvelinus curilus	NC_024585	Marine/Freshwater	South Asian Dolly Varden char
Salvelinus fontinalis	NC_000860	Marine/Freshwater	Brook trout
Salvelinus kuznetzovi	NC_029877	Freshwater	Stone char
Salvelinus leucomaenis	NC_022844	Marine/Freshwater	Whitespotted char
Stenodus leucichthys	NC_020761	Marine/Freshwater	Sheefish
Thymallus arcticus	NC_012929	Freshwater	Arctic grayling
Thymallus brevirostris	NC_027412	Freshwater	Mongolian grayling
Thymallus burejensis	NC_027411	Freshwater	Grayling
Thymallus grubii	NC_022925	Freshwater	Amur grayling
Thymallus mertensii	NC_029216	Freshwater	Kamchatka grayling
Thymallus pallasii	NC_027408	Freshwater	East Siberian grayling
Thymallus thymallus	NC_012928	Freshwater	Bureya grayling
Thymallus tugarinae	NC_027409	Freshwater	lower Amur grayling
Thymallus yaluensis	NC_027410	Freshwater	Grayling
Esox lucius	NC_004593	Freshwater	Northern pike
Osmerus mordax	NC_015246	Freshwater	Rainbow smelt
